# Supplementary material
Source: publisher figshare collection journal article supplement (https://f1000.figshare.com/ndownloader/files/1217784)
Supplement: Supplementary file 1 [file 1217784]

Gene:	Lmo3
Age:	P7
		CA1	% Ctrl CA1	CA3	% Ctrl CA3	DG	% Ctrl DG
Control	1	93.79	133.97%	86.69	137.30%	59.13	114.38%
	2	80.62	115.17%	86.21	136.54%	65.49	126.68%
	3	91.98	131.40%	78.56	124.42%	68.53	132.57%
	4	27.3	39.00%	23.78	37.65%	24.25	46.91%
	5	36.07	51.52%	28.9	45.76%	22.74	43.98%
	6	69.47	99.24%	59.43	94.12%	43.94	84.99%
	7	90.8	129.70%	78.42	124.20%	77.8	150.49%
	Mean	70	100.00%	63.14	100.00%	51.7	100.00%
	SD	27.6	39.42%	26.75	42.37%	21.84	42.25%
	SEM	10.43	14.90%	10.11	16.01%	8.26	15.97%
Treated	1	57.57	82.24%	45.21	71.60%	35.88	69.41%
	2	76.67	109.52%	63.6	100.73%	58.59	113.34%
	3	99.26	141.80%	82.47	130.62%	76.17	147.34%
	4	46.29	66.12%	42.17	66.79%	29.18	56.45%
	5	26.85	38.35%	25.01	39.61%	25.29	48.92%
	6	85.05	121.49%	84.87	134.41%	59.7	115.48%
	7	67.36	96.22%	75.37	119.37%	42.8	82.79%
	8	83.99	119.97%	62.99	99.77%	54.9	106.19%
	Mean	67.88	96.97%	60.21	95.36%	47.82	92.49%
	SD	23.52	33.60%	21.19	33.56%	17.46	33.77%
	SEM	8.32	11.88%	7.49	11.86%	6.17	11.94%
Final values
		CA1	CA3	DG
	Ctrl	100	100	100
	Trt	96.97	95.36	92.49
	SEM Ctrl	14.9	16.01	15.97
	SEM Trt	11.88	11.86	11.94
